# Supplementary material for: CRISPR/Cas9-Mediated SlATG5 Mutagenesis Reduces the Resistance of Tomato Fruit to Botrytis cinerea
Source: MDPI journal article supplement (doi:10.3390/foods12142750), 2023-07-19
Supplement: s1 [file s1]

**Table S1. Primers used in recombinant pYLCRISPR/Cas9 vector construction**

| Purpose             | Primers                | Sequence (5'→3')                                     |
|---------------------|------------------------|------------------------------------------------------|
| 1 <sup>st</sup> PCR | U-F                    | CTCCGTTTTACCTGTGGAATCG                               |
|                     | gR-R                   | CGGAGGAAAATTCCATCCAC                                 |
|                     | A5gRT1 <sup>+</sup>    | GAGGCAGGTACCCAATTCGGTTTTAGAGCTAGAAAT                 |
|                     | A5AtU3bT1 <sup>-</sup> | CGAATTGGGTACCTGCCTCTGACCAATGTTGCTCC                  |
|                     | A5gRT2 <sup>+</sup>    | TGGAGCGCCAGAGTTCTAATGTTTTAGAGCTAGAAAT                |
|                     | A5AtU3dT2 <sup>-</sup> | ATTAGAACTCTGGCGCTCCATGACCAATGGTGCTTTG                |
| 2 <sup>nd</sup> PCR | Pps-GGL                | TTCAGAG <u>GGTCTCT</u> CTCGACTAGTATGGAATCGGCAGCAAAGG |
|                     | Pgs-GG2                | AGCGTG <u>GGTCTCT</u> CGTCAGGGTCCATCCACTCCAAGCTC     |
|                     | Pps-GG2                | TTCAGAG <u>GGTCTCT</u> CTGACACTGGAATCGGCAGCAAAGG     |
|                     | Pgs-GGR                | AGCGTG <u>GGTCTCT</u> GACCGACGCGTATCCATCCACTCCAAGCTC |

The restriction enzyme *Bsa*I site was underlined.

**Table S2. Oligonucleotide primers used in mutation detection**

| Purpose                         | Primer    | Sequence (5'→3')          |
|---------------------------------|-----------|---------------------------|
| Transgenic plant identification | Hyg for   | CTTGACATTGGGGAGTTTAGCGAGA |
|                                 | Hyg rev   | CCCTTATCTGGGAACTACTCACACA |
| Mutation detection              | ATG5-T1-F | CTCTCCACCAGACTCTCTCT      |
|                                 | ATG5-T1-R | TCCAGTACAATCCACGTACT      |
|                                 | T1 seq    | CACACACACACATATATATAGAGAG |
|                                 | ATG5-T2-F | CTGTGGGACTATGTAGGTTG      |
|                                 | ATG5-T2-R | TTTTGTGTTCTGATGGTGTT      |
|                                 | T2 seq    | AGATGTGCGATTGGGTTTTACAATC |

**Table S3. Sequences of Specific Primers Used for qPCR Analysis**

| name           | accession no. | forward primer (5' → 3')  | reverse primer (5' → 3')  |
|----------------|---------------|---------------------------|---------------------------|
| <i>β-actin</i> | NM_001308447  | CAGCAGATGTGGATCTCAAA      | CTGTGGACAATGGAAGGAC       |
| <i>SIEDS1</i>  | NM_001320249  | GGAATTGAAGTCAGAGATGAGCTAA | AAAGTTCCAGCAAAAAGCAAAAA   |
| <i>SIPAD4</i>  | XM_019212160  | CCGTGATCAGATGGTAGAAATAATG | CGGCAGAGAAGCCAGAGAGT      |
| <i>SIPRI</i>   | NM_001247429  | TGGTATTAGCCATATTTAC       | CCAGTTGCCTACAGGATC        |
| <i>SLJAZ1</i>  | NM_001247954  | CGAGACGGAATTCACCTACAAGA   | TGAGCACCTAATCCCAACCAT     |
| <i>SIMYC2</i>  | NM_001324483  | GGAGGCGAAGACTCTGAACATT    | GCTGGCTTTCTACCTCGCTTC     |
| <i>SILOXD</i>  | NM_001320292  | CGAACTTGAAAACAGAGCGA      | GTAATACTCTCCAGAAAGAACTCCT |
| <i>SINPRI</i>  | NM_001247629  | TGTTTTATGTGGATTGGTGGCT    | CTTCTGCTTGATGGGATGACTG    |
| <i>SLATG5</i>  | XM_010317407  | AAGAGCAACACGGAACGAAGT     | TACCACCCATGCAAAAGGAAT     |

**Table S4. Editing type of *slatg5* mutants in T0 generation**

|                             |          |                                                                                                                                                                                                                                    |
|-----------------------------|----------|------------------------------------------------------------------------------------------------------------------------------------------------------------------------------------------------------------------------------------|
| CR-ATG5-2<br>(Biallelic)    | Target 1 | Reference: ATTGCAGATTTTAGCTCCTCGAATTGGGTACCTGCCTCTTTTAGCACAAAAAGTA<br>Allele1: ATTGCAGATTTTAGCTCCTCBAATTGGGTACCTGCCTCTTTTAGC (substitution)<br>Allele2: ATTGCAGATTTTAGCTCCTC (12-bp del) CTGCCTCTTTT (573-bp del) ATCAC (deletion) |
| CR-ATG5-3<br>(Biallelic)    | Target 2 | Reference:ATATGTCCCAATCTGACCAATTAGAACTCTGGCGCTCCATTATGG<br>Allele1:ATATGTCCCAATCTGACCAA--AGAACTCTGGCGCTCCATTATGG(deletion)<br>Allele2:ATATGTCCCAATCTGACCAATTTCAGCCCCGCCAT (complicated variant)                                    |
| CR-ATG5-7<br>(heterozygous) | Target 2 | Reference:TGAATATGTCCCAATCTGACCAATTAGAACTCTGGCGCTCCATTATGG<br>Allele1:TGAATATGTCCCAATCTGACCAATTAGAACTCTGGCGCTCCATTATGG (WT)<br>Allele2:TGAATATGTCCCAATCT-----CTGGCGCTCCAT (deletion)                                               |

Target sequences are shown in red letters. Deletion is denoted in green. Insertion is expressed with a green letter and substitution is shown in a blue letter. Complex variant regions marked yellow.

**Table S5. CRISPR/Cas9-Mediated Mutagenesis and Transmission from T0 to T1 Generation**

| Transgenic<br>line | T0       |             | T1 mutation segregation |    |              |            |                           |
|--------------------|----------|-------------|-------------------------|----|--------------|------------|---------------------------|
|                    | Zygosity | Genotype    | No. of plants tested    | Wt | Biallele     | Homozygote | Heterozygote              |
| L2                 | T1 (Bia) | s1, d585    | 20                      | 7  | 8 (s1, d585) | 0          | 3 (wt, s1)<br>2 (wt, d12) |
| L3                 | T2 (Bia) | d1, variant | 8                       | 8  | 0            | 0          | 0                         |
| L7                 | T2 (He)  | wt, d14     | 10                      | 3  | 3 (d14, s1)  | 0          | 4 (wt, d14)               |

d#, the number of bases deleted from the target sequences; s#, the number of bases substituted origin target sequences; wt, wild-type sequence without mutations detected at target sequences.
